# Supplementary material for: Monitoring of Enterovirus D68 Outbreak in Israel by a Parallel Clinical and Wastewater Based Surveillance
Source: MDPI journal article supplement (doi:10.3390/v14051010), 2022-05-09
Supplement: s1 [file s1]

## Supplementary Material

**Table S1.** EVD68+MS2 duplex assay setup and thermal profile for clinical testing.

| Component                          | Final Concentration | Volume/ Reaction(μl) |
|------------------------------------|---------------------|----------------------|
| 2X Sensifast Probe Lo-ROX One step |                     | 10.00                |
| H <sub>2</sub> O                   |                     | 3.30                 |
| EVD68 NU Fwd 40μM                  | 600nM               | 0.30                 |
| EVD68 NU Rev1 40 μM                | 400nM               | 0.30                 |
| EVD68 NU Rev2 40 μM                | 400nM               | 0.30                 |
| EVD68 NU Probe FAM 20 μM           | 400nM               | 0.40                 |
| MS2-F 80μM                         | 600nM               | 0.15                 |
| MS2-R 80μM                         | 600nM               | 0.15                 |
| MS2-P 60μM                         | 400nM               | 0.13                 |
| RT-Enzyme SensiFast                |                     | 0.20                 |
| RNAse inhibitor                    |                     | 0.20                 |
| RNA                                |                     | 5                    |
| Total reaction volume              |                     | 20                   |
| <b>Thermal Profile</b>             |                     |                      |
| Time                               | Temperature °C      | Repeats              |
| 15 min                             | 45°C                | 1                    |
| 2 min                              | 95°C                | 1                    |
| 15 sec                             | 95°C                | 45                   |
| 45 sec <sup>1</sup>                | 55°C                | 45                   |

<sup>1</sup>Fluorescence was read at the end of each cycle.

**Table S2.** EVD68+MS2 duplex assay setup and thermal profile for wastewater testing.

| Component               | Final Concentration | Volume/ Reaction (μl) |
|-------------------------|---------------------|-----------------------|
| 4X Bio Rad Reliance mix |                     | 5.0                   |
| H <sub>2</sub> O        |                     | 8.6                   |
| EVD68 NU Fwd 40uM       | 600nM               | 0.3                   |
| EVD68 NU Rev1 40uM      | 600nM               | 0.3                   |
| EVD68 NU Rev2 40uM      | 600nM               | 0.3                   |
| EVD68 NU Probe FAM 20uM | 400nM               | 0.2                   |
| MS2-F 80μM              | 600nM               | 0.12                  |
| MS2-R 80μM              | 600nM               | 0.12                  |
| MS2-P 60μM              | 400nM               | 0.10                  |
| Total                   |                     | 15.0                  |
| RNA                     |                     | 5                     |
| <b>Thermal Profile</b>  |                     |                       |
| Time                    | Temperature °C      | Repeats               |
| 15 min                  | 50°C                | 1                     |
| 10 min                  | 95°C                | 1                     |
| 10 sec                  | 95°C                | 45                    |
| 40 sec <sup>1</sup>     | 55°C                | 45                    |

<sup>1</sup>Fluorescence was read at the end of each cycle.

**Table S3.** Reaction setup for control standard *In vitro* transcription.

| Component                                 | Volume/Reaction (μl) |
|-------------------------------------------|----------------------|
| 2X PCRBIO 1-Step Go mix (www.pcrbio.com/) | 20                   |
| EVD68 2360Fwd 10μM                        | 1.5                  |
| EVD68 2985Rev 10μM stock                  | 1.5                  |
| RT enzyme                                 | 0.2                  |
| H <sub>2</sub> O                          | 11.8                 |
| RNA                                       | 5                    |
| Total                                     | 40                   |

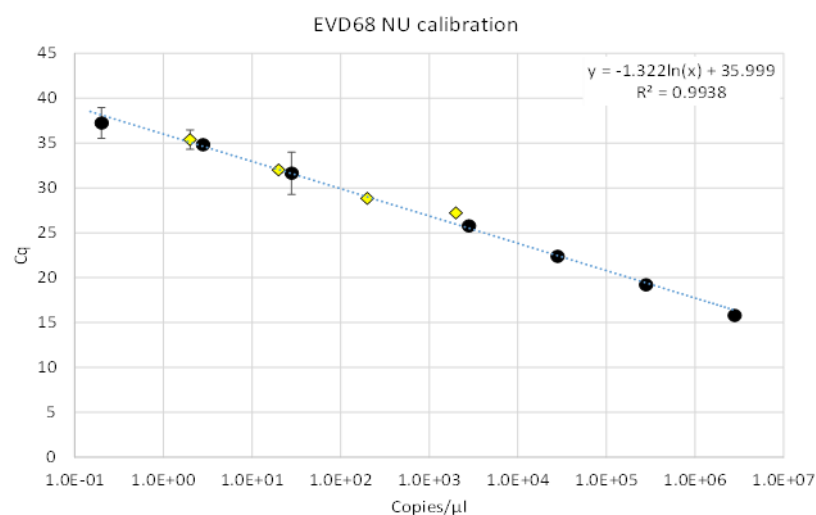

**Figure S1.** Calibration of the EVD68-MS2 duplex assay. Serial dilutions of IVT standard (black circles) and of commercial whole genome (yellow diamonds), were tested in triplicates using the NU EVD and MS2 primer sets. The standard deviation bars, logarithmic regression formula derived from the calibration curve, and R<sup>2</sup> value are shown.
